# Supplementary material for: Survival Rate of Breast Cancer in Eastern Mediterranean Region Countries: A Systematic Review and Meta-Analysis
Source: PubMed Central journal article supplement (PMC6896839; doi:10.5334/aogh.2521), 2019-12-04
Supplement: agh-85-1-2521-s1.pdf [file agh-85-1-2521-s1.pdf]

Appendix 1. Newcastle-Ottawa Quality Assessment Form

| <b>Author (year)</b> | <b>Selection</b> | <b>Comparability</b> | <b>Outcome</b> | <b>Total</b> | <b>Quality</b> |
|----------------------|------------------|----------------------|----------------|--------------|----------------|
| Al-Idrissi, 1992     | 2                | 1                    | 2              | 5            | Fair           |
| Ibrahim, 1998        | 2                | 1                    | 1              | 4            | Fair           |
| Fakhro, 1999         | 3                | 1                    | 2              | 6            | Good           |
| Ahmed,2002           | 3                | 1                    | 2              | 6            | Good           |
| Al Moundhri,2004     | 2                | 2                    | 2              | 6            | Good           |
| Motawy, 2004         | 3                | 2                    | 2              | 7            | Good           |
| Vahdaninia, 2004     | 3                | 1                    | 2              | 6            | Good           |
| Ghavam-Nasiri, 2005  | 2                | 1                    | 2              | 5            | Fair           |
| Ibrahim, 2005        | 2                | 1                    | 2              | 5            | Fair           |
| Ravichandran, 2005   | 3                | 1                    | 3              | 7            | Good           |
| Babaei, 2005         | 2                | 1                    | 2              | 5            | Fair           |
| Rajaeifard, 2005     | 3                | 1                    | 3              | 7            | Good           |
| Mousavi, 2006        | 2                | 1                    | 2              | 5            | Fair           |
| Akbari, 2006         | 2                | 1                    | 3              | 6            | Good           |
| Khanfir, 2006        | 2                | 2                    | 2              | 6            | Good           |
| Yaghmaei, 2008       | 2                | 2                    | 2              | 6            | Good           |
| Heydari,2009         | 2                | 2                    | 2              | 6            | Good           |
| Rezaianzadeh, 2009   | 2                | 1                    | 3              | 6            | Good           |

|                   |   |   |   |   |      |
|-------------------|---|---|---|---|------|
| Sadjadi, 2009     | 2 | 1 | 2 | 5 | Fair |
| Abahssain, 2010   | 4 | 1 | 3 | 8 | Good |
| Arkoob, 2010      | 2 | 2 | 2 | 5 | Good |
| El Mongy, 2010    | 3 | 1 | 3 | 7 | Good |
| Al-Moundhri, 2011 | 2 | 1 | 2 | 5 | Fair |
| Fouladi, 2011     | 2 | 2 | 2 | 6 | Good |
| Hamdan, 2011      | 3 | 1 | 3 | 7 | Good |
| Tarawneh, 2011    | 3 | 1 | 3 | 7 | Good |
| Movahedi, 2012    | 2 | 1 | 3 | 6 | Good |
| Rahmani, 2012     | 2 | 1 | 3 | 6 | Good |
| Rais, 2012        | 2 | 1 | 2 | 5 | Fair |
| Vostakolaei, 2012 | 2 | 1 | 2 | 5 | Fair |
| Ziaei, 2013       | 2 | 2 | 2 | 5 | Good |
| Haghighat, 2013   | 2 | 1 | 2 | 5 | Fair |
| Fallahzadeh, 2014 | 4 | 1 | 3 | 8 | Good |
| Fayaz, 2014       | 4 | 1 | 3 | 8 | Good |
| Sedehi, 2014      | 2 | 1 | 2 | 5 | Fair |
| Fazeli, 2014      | 2 | 2 | 2 | 6 | Good |
| Hamadeh, 2014     | 2 | 1 | 3 | 6 | Good |
| Faradmal, 2014    | 2 | 2 | 2 | 6 | Good |
| Karimi, 2014      | 2 | 1 | 2 | 5 | Fair |

|                            |   |   |   |   |      |
|----------------------------|---|---|---|---|------|
| Baghestani, 2015           | 2 | 1 | 2 | 5 | Fair |
| El Mistiri, 2015           | 2 | 2 | 2 | 6 | Good |
| Jamshed, 2015              | 2 | 1 | 2 | 5 | Fair |
| Mahmood, 2015              | 2 | 1 | 2 | 5 | Fair |
| Rampisheh, 2015            | 3 | 2 | 3 | 8 | Good |
| Payandeh, 2015             | 2 | 2 | 2 | 6 | Good |
| Rejali, 2015               | 2 | 1 | 2 | 5 | Fair |
| Derkaoui, 2016             | 2 | 2 | 2 | 6 | Good |
| Faradmal, 2016             | 3 | 2 | 2 | 7 | Good |
| Kumar, 2016                | 2 | 2 | 2 | 6 | Good |
| Mechita, 2016              | 2 | 2 | 3 | 7 | Good |
| Rahimzadeh, 2016           | 2 | 2 | 2 | 6 | Good |
| YektaKooshali, 2016        | 2 | 2 | 2 | 6 | Good |
| Bakhshi, 2017              | 2 | 2 | 2 | 6 | Good |
| Davoudi<br>Monfared,2017   | 2 | 2 | 2 | 6 | Good |
| El Amine Elhadj, 2017      | 2 | 1 | 2 | 5 | Good |
| Hosseinpour Feizi,<br>2017 | 2 | 2 | 2 | 6 | Good |
| Najafi, 2017               | 2 | 2 | 2 | 6 | Good |
